# Supplementary material for: AROS Is a Significant Biomarker for Tumor Aggressiveness in Non-cirrhotic Hepatocellular Carcinoma
Source: PubMed Central journal article supplement — J Korean Med Sci. 2015 Aug 13;30(9):1253–9. doi: 10.3346/jkms.2015.30.9.1253 (PMC4553671; doi:10.3346/jkms.2015.30.9.1253), 2015-08-13
Supplement: jkms-30-1253-s001.pdf [file jkms-30-1253-s001.pdf]

**Table S1.** Sequences of primers and probes

| Genes        |   | Sequences                    |
|--------------|---|------------------------------|
| <i>AROS</i>  | F | CGGAAGACGAAGGCAATTCA         |
|              | R | GCCGACTTGGGCACCTTT           |
|              | P | CCAGAAACTGCGGAACTCGGCCA      |
| <i>B2M</i>   | F | CATTCGGGCCGAGATGTCT          |
|              | R | CTCCAGGCCAGAAAGAGAGAGTAG     |
|              | P | CCGTGGCCTTAGCTGTGCTCGC       |
| <i>GAPDH</i> | F | CACATGGCCTCCAAGGAGTAA        |
|              | R | TGAGGGTCTCTCTTCTCCTTGT       |
|              | P | CTGGACCACCAGCCCAGCAAG        |
| <i>HMBS</i>  | F | CCAGGGATTTGCCTCACCTT         |
|              | R | AAAGAGATGAAGCCCCACAT         |
|              | P | CCTTGATGACTGCCTTGCTCCTCAG    |
| <i>HPRT1</i> | F | GCTCGAGATGTGATGAAGGAGAT      |
|              | R | CCAGCAGGTCAGCAAAGAATT        |
|              | P | CCATCACATTGTAGCCCTCTGTGTGCTC |
| <i>SDHA</i>  | F | CACCTAGTGGCTGGGAGCTT         |
|              | R | GCCCAGTTTATCATCTCACAAGA      |
|              | P | TGGCACTTACCTTTGTCCCTTGCTTCA  |
