# Supplementary material for: AROS Is a Significant Biomarker for Tumor Aggressiveness in Non-cirrhotic Hepatocellular Carcinoma
Source: PubMed Central journal article supplement — J Korean Med Sci. 2015 Aug 13;30(9):1253–9. doi: 10.3346/jkms.2015.30.9.1253 (PMC4553671; doi:10.3346/jkms.2015.30.9.1253), 2015-08-13
Supplement: jkms-30-1253-s002.pdf [file jkms-30-1253-s002.pdf]

**Table S2.** Comparison of clinicopathological information between cirrhotic HCC and non-cirrhotic HCC

| Clinicopathologic parameters   | Cirrhotic HCC (n = 249) | Non-cirrhotic HCC (n = 283) | P value  |
|--------------------------------|-------------------------|-----------------------------|----------|
| Age (< 55 / ≥ 55 yr)           | 150/99                  | 155/128                     | 0.236    |
| Gender (Male/Female)           | 198/51                  | 219/64                      | 0.624    |
| Hepatitis B infection (n, %)   | 221 (88.9)              | 180 (63.6)                  | < 0.001* |
| Hepatitis C infection (n, %)   | 10 (4.0)                | 25 (8.8)                    | 0.042*   |
| Tumor stage (I/II/III, IV)     | 105/96/48               | 107/113/63                  | 0.532    |
| BCLC stage (A/B/C)             | 142/75/32               | 128/119/36                  | 0.012*   |
| AFP level (> 100 ng/mL, %)     | 125 (50.2)              | 125 (44.1)                  | 0.205    |
| Microvascular invasion (n, %)  | 141 (56.6)              | 180 (63.6)                  | 0.109    |
| Tumor number (multiple, %)     | 58 (23.3)               | 68 (24.0)                   | 0.923    |
| Tumor size (≤ 5 / > 5 cm)      | 175/74                  | 144/139                     | < 0.001* |
| Edmondson grade (I/II/III, IV) | 27/169/53               | 25/21/46                    | 0.195    |
| Portal Vein Invasion (n, %)    | 32 (12.8)               | 35 (12.3)                   | 0.971    |

\*Analyzed by chi square test. BCLC, Barcelona Clinic Liver Cancer; AFP, alpha fetoprotein.
