# Supplementary material for: AROS Is a Significant Biomarker for Tumor Aggressiveness in Non-cirrhotic Hepatocellular Carcinoma
Source: PubMed Central journal article supplement — J Korean Med Sci. 2015 Aug 13;30(9):1253–9. doi: 10.3346/jkms.2015.30.9.1253 (PMC4553671; doi:10.3346/jkms.2015.30.9.1253), 2015-08-13
Supplement: jkms-30-1253-s003.pdf [file jkms-30-1253-s003.pdf]

**Table S3.** Univariate and multivariate analysis of prognostic factors for 5-yr disease-free survival

| Variables                               | Univariate analysis |           |          | Multivariate analysis |           |          |
|-----------------------------------------|---------------------|-----------|----------|-----------------------|-----------|----------|
|                                         | HR                  | 95% CI    | <i>P</i> | HR                    | 95% CI    | <i>P</i> |
| Age (< 55 yr / ≥ 55 yr)                 | 1.07                | 0.78-1.46 | 0.662    |                       |           |          |
| Gender (male/female)                    | 1.55                | 1.10-2.19 | 0.012    |                       |           |          |
| Edmondson grade (I, II vs. III, IV)     | 1.71                | 1.15-2.53 | 0.078    |                       |           |          |
| HBV (absent vs. present)                | 1.29                | 0.93-1.79 | 0.131    |                       |           |          |
| HCV (absent vs. present)                | 1.54                | 0.94-1.42 | 0.085    |                       |           |          |
| AFP level (< 100 ng/mL vs. ≥ 100 ng/mL) | 1.63                | 1.19-2.23 | 0.002    |                       |           |          |
| Tumor size (≤ 5 cm vs. > 5 cm)          | 1.94                | 1.42-2.66 | 0.000    |                       |           |          |
| Tumor stage (I, II vs. III, IV)         | 3.36                | 2.40-4.71 | 0.000    |                       |           |          |
| Vascular Invasion (absent vs. present)  | 2.92                | 2.01-4.24 | 0.000    | 2.13                  | 1.40-3.24 | 0.001    |
| Tumor number (single vs. multi)         | 2.61                | 1.87-3.64 | 0.000    |                       |           |          |
| AROS (low vs. high)                     | 1.61                | 1.15-2.27 | 0.005    | 1.21                  | 0.84-1.73 | 0.309    |
