# Supplementary material for: AROS Is a Significant Biomarker for Tumor Aggressiveness in Non-cirrhotic Hepatocellular Carcinoma
Source: PubMed Central journal article supplement — J Korean Med Sci. 2015 Aug 13;30(9):1253–9. doi: 10.3346/jkms.2015.30.9.1253 (PMC4553671; doi:10.3346/jkms.2015.30.9.1253), 2015-08-13
Supplement: jkms-30-1253-s004.pdf [file jkms-30-1253-s004.pdf]

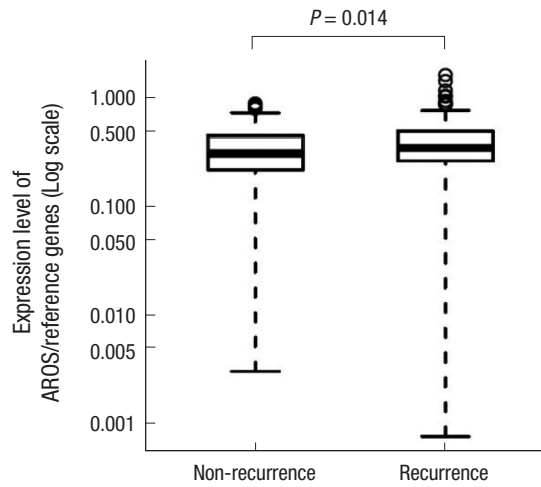

**Fig. S1.** Comparative analysis of AROS mRNA levels in HCC tissues with (recu) or without postoperative recurrence (non-recu) within 5 yr. AROS expression was higher in recurrent tumors than in non-recurrent tumors exclusively in NonLC.
