# Supplementary material for: AROS Is a Significant Biomarker for Tumor Aggressiveness in Non-cirrhotic Hepatocellular Carcinoma
Source: PubMed Central journal article supplement — J Korean Med Sci. 2015 Aug 13;30(9):1253–9. doi: 10.3346/jkms.2015.30.9.1253 (PMC4553671; doi:10.3346/jkms.2015.30.9.1253), 2015-08-13
Supplement: jkms-30-1253-s005.pdf [file jkms-30-1253-s005.pdf]

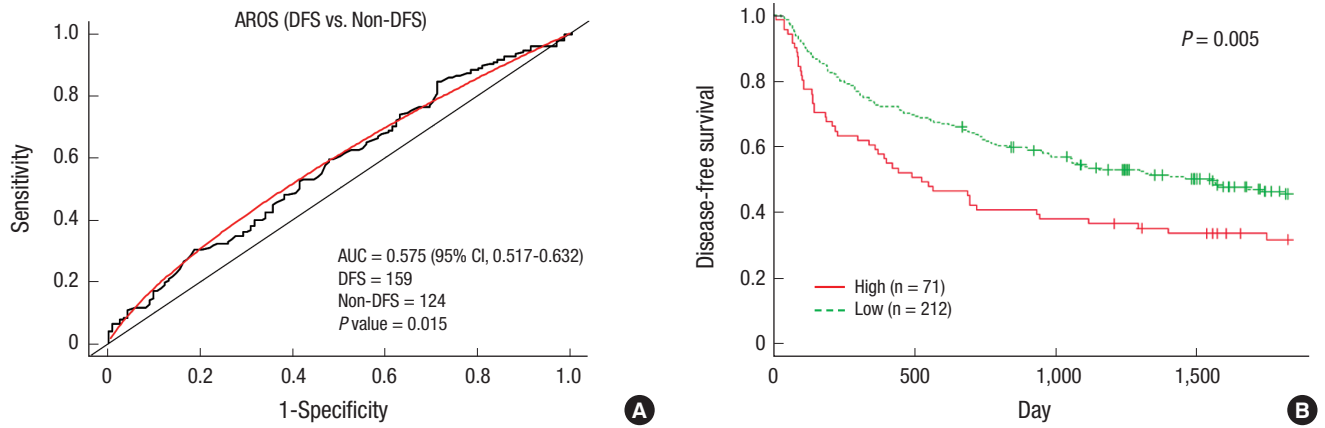

**Fig. S2.** Non-cirrhotic HCC patients with high levels of AROS expression have a shorter DFS for 5 yr. (A) AUC was 0.575. (B) AROS-high group showed significant shorter DFS time ( $P = 0.00495$ ). Thin lines, patients expressed higher levels of AROS ( $n = 71$ ); broken lines, patients expressed lower levels of AROS ( $n = 212$ ).
